# Supplementary material
Source: publisher figshare collection journal article supplement (https://diabetesjournals.figshare.com/articles/dataset/_/21120907)
Supplement: Supplementary file 1 [file 37887879]

## **Table of Speakers and Moderators**

### **Speakers**

|                                        |                                                                                                         |
|----------------------------------------|---------------------------------------------------------------------------------------------------------|
| Simon Heller, MB, BChir, DM, FRCP      | University of Sheffield, UK                                                                             |
| Elizabeth Seaquist, MD.                | University of Minnesota, US                                                                             |
| Raimund Herzog, MD, MHS.               | Yale School of Medicine, US                                                                             |
| Rory McCrimmon, MBChB, MD, FRCPE, FRSE | University of Dundee, Scotland                                                                          |
| Matthew Whim, Ph.D.                    | LSU School of Medicine, US                                                                              |
| Paul J. Kenney, Ph.D.                  | Icahn School of Medicine at Mount Sinai, US                                                             |
| Conor Liston, MD, Ph.D.                | Weill Cornell Medicine, US                                                                              |
| Silvia Mangia, Ph.D.                   | University of Minnesota, US                                                                             |
| Jane Speight, Ph.D.                    | The Australian Centre for Behavioural<br>Research in Diabetes: Diabetes Victoria &<br>Deakin University |
| Pratik Choudhary, MBBS, MD FRCP        | University of Leicester, UK                                                                             |
| Michael Rickels, MD, MSc.              | University of Pennsylvania, US                                                                          |
| Stephanie Amiel, BSc, MD, FRCP         | Kings College, UK                                                                                       |
| Simon Fisher, MD.                      | University of Kentucky, US                                                                              |
| James AM Shaw, BSc, MBChB, PhD, FRCP   | Newcastle University, UK                                                                                |

### **Moderators**

|                                    |                                         |
|------------------------------------|-----------------------------------------|
| Meredith Hawkins, MD, MS.          | Albert Einstein College of Medicine, US |
| Janice Hwang, MD.                  | UNC School of Medicine, US              |
| Alan Watts, D.Phil                 | University of Southern California, US   |
| Ana Maria Arbelaez, M.D., M.S.C.I. | Washington University at St. Louis, US  |
| Amir Moheet, M.B.B.S.              | University of Minnesota, US.            |
